1 ***cis*TEM: User-friendly software for single-particle image processing**

2  
3 Tim Grant <sup>1</sup>, Alexis Rohou <sup>1,2</sup> and Nikolaus Grigorieff <sup>1</sup>

4 <sup>1</sup> Janelia Research Campus, Howard Hughes Medical Institute, Ashburn, Virginia, USA

5 <sup>2</sup> Present address: Department of Structural Biology, Genentech, South San Francisco, California, USA

6  
7 **Abstract**

8 We have developed new open-source software called *cis*TEM (computational imaging system  
9 for transmission electron microscopy) for the processing of data for high-resolution electron  
10 cryo-microscopy and single-particle averaging. *cis*TEM features a graphical user interface that is  
11 used to submit jobs, monitor their progress, and display results. It implements a full processing  
12 pipeline including movie processing, image defocus determination, automatic particle picking,  
13 2D classification, ab-initio 3D map generation from random parameters, 3D classification, and  
14 high-resolution refinement and reconstruction. Some of these steps implement newly-developed  
15 algorithms; others were adapted from previously published algorithms. The software is  
16 optimized to enable processing of typical datasets (2000 micrographs, 200k – 300k particles) on  
17 a high-end, CPU-based workstation in half a day or less, comparable to GPU-accelerated  
18 processing. Jobs can also be scheduled on large computer clusters using flexible run profiles that  
19 can be adapted for most computing environments. *cis*TEM is available for download from  
20 [cistem.org](http://cistem.org).

## 22 **Introduction**

23 The three-dimensional (3D) visualization of biological macromolecules and their assemblies by  
24 single-particle electron cryo-microscopy (cryo-EM) has become a prominent approach in the  
25 study of molecular mechanisms (Cheng et al., 2015; Subramaniam et al., 2016). Recent advances  
26 have been primarily due to the introduction of direct detectors (McMullan et al., 2016). With the  
27 improved data quality, there is increasing demand for advanced computational algorithms to  
28 extract signal from the noisy image data and reconstruct 3D density maps from them at the  
29 highest possible resolution. The promise of near-atomic resolution ( $3 - 4 \text{ \AA}$ ), where densities can  
30 be interpreted reliably with atomic models, has been realized by many software tools and suites  
31 (Frank et al., 1996; Hohn et al., 2007; Lyumkis et al., 2013; Scheres, 2012; Tang et al., 2007; van  
32 Heel et al., 1996). Many of these software tools implement a standard set of image processing  
33 steps that are now routinely performed in a single particle project. These typically include movie  
34 frame alignment, contrast transfer function (CTF) determination, particle picking, two-  
35 dimensional (2D) classification, 3D reconstruction, refinement and classification, and sharpening  
36 of the final reconstructions.

37 We have written new software called *cis*TEM to implement a complete image processing  
38 pipeline for single-particle cryo-EM, including all these steps, accessible through an easy-to-use  
39 graphical user interface (GUI). Some of these steps implement newly-developed algorithms  
40 described below; others were adapted from previously published algorithms. *cis*TEM consists of  
41 a set of compiled programs and tools, as well as a wxWidgets-based GUI. The GUI launches  
42 programs and controls them by sending specific commands and receiving results via TCP/IP  
43 sockets. Each program can also be run manually, in which case it solicits user input on the  
44 command line. The design of *cis*TEM, therefore, allows users who would like to have more

45 control over the different processing steps to design their own procedures outside the GUI. To  
46 adopt this new architecture, a number of previously existing Fortran-based programs were  
47 rewritten in C++, including Unblur and Summovie (Grant and Grigorieff, 2015b),  
48 mag\_distortion\_estimate and mag\_distortion\_correct (Grant and Grigorieff, 2015a), CTFFIND4  
49 (Rohou and Grigorieff, 2015), and Frealign (Lyumkis et al., 2013). Additionally, algorithms  
50 described previously were added for particle picking (Sigworth, 2004), 2D classification  
51 (Scheres et al., 2005) and ab-initio 3D reconstruction (Grigorieff, 2016), sometimes with  
52 modifications to optimize their performance.

53 *cis*TEM currently does not support computation on graphical processing units (GPUs).  
54 Benchmarking of a hotspot identified in the global orientational search to determine particle  
55 alignment parameters showed that an NVIDIA K40 GPU performs approximately as well as 16  
56 Xeon E5-2687W CPU cores after the code was carefully optimized for the respective hardware  
57 in both cases. Since CPU code is more easily maintained and more generally compatible with  
58 existing computer hardware, the potential benefit of GPU-adapted code is primarily the lower  
59 cost of a high-end GPU compared with a high-end CPU. We chose to focus on optimizing our  
60 code for CPU.

61

## 62 **Results**

### 63 *Movie alignment and CTF determination*

64 Movie alignment and CTF determination are based on published algorithms previously  
65 implemented in Unblur and Summovie (Grant and Grigorieff, 2015b), and CTFFIND4 (Rohou  
66 and Grigorieff, 2015), respectively, and these are therefore only briefly described here. Unblur

67 determines the translations of individual movie frames necessary to bring features (particles)  
68 visible in the frames into register. Each frame is aligned against a sum of all other frames that is  
69 iteratively updated until there is no further change in the translations. The trajectories along the  
70 x- and y-axes are smoothed using a Savitzky–Golay filter to reduce the possibility of spurious  
71 translations. Summovie uses the translations to calculate a final frame average with optional  
72 exposure filtering to take into account radiation damage of protein and maximize its signal in the  
73 final average. *cisTEM* combines the functionality of Unblur and Summovie into a single panel  
74 and exposes all relevant parameters to the user (Figure 1). Both programs were originally written  
75 in Fortran and have been rewritten entirely in C++.

76 CTFFIND4 fits a calculated two-dimensional CTF to Thon rings (Thon, 1966) visible in the  
77 power spectrum calculated from either images or movies. The fitted parameters include  
78 astigmatism and, optionally, phase shifts generated by phase plates. When computed from  
79 movies, the Thon rings are often more clearly visible compared to Thon rings calculated from  
80 images (Figure 2; (Bartesaghi et al., 2014)). When selecting movies as inputs, the user can  
81 specify how many frames should be summed to calculate power spectra. An optimal value to  
82 amplify Thon rings would be to sum the number of frames that correspond to an exposure of  
83 about 4 electrons/Å<sup>2</sup> (McMullan et al., 2015).

84 Since our original description of the CTFFIND4 algorithm (Rohou and Grigorieff, 2015),  
85 several significant changes were introduced. (1) The initial exhaustive search over defocus  
86 values can now be performed using a one-dimensional version of the CTF (i.e. with only two  
87 parameters: defocus and phase shift) against a radial average of the amplitude spectrum. This  
88 search is much faster than the equivalent search over the 2D CTF parameters (i.e., four  
89 parameters: two for defocus, one for astigmatism angle and one for phase shift) and can be

90 expected to perform well except in cases of very large astigmatism (Zhang, 2016). Once an  
91 initial estimate of the defocus parameter has been obtained, it is refined by a conjugate gradient  
92 minimizer against the 2D amplitude spectrum, as done previously. In *cis*TEM, the default  
93 behavior is to perform the initial search over the 1D amplitude spectrum, but the user can revert  
94 to previous behavior by setting a flag in the “Expert Options” of the “Find CTF” Action panel.  
95 (2) If the input micrograph’s pixel size is smaller than 1.4 Å, the resampling and clipping of its  
96 2D amplitude spectrum will be adjusted so as to give a final spectrum for fitting with an edge  
97 corresponding to  $1/2.8 \text{ \AA}^{-1}$ , to avoid all of the Thon rings being located near the origin of the  
98 spectrum, where they can be very poorly sampled. (3) The computation of the quality of fit  
99 ( $CC_{fit}$  in (Rohou and Grigorieff, 2015)) is now computed over a moving window, similar to  
100 (Sheth et al., 2015), rather than at intervals delimited by nodes in the CTF. (4) Following  
101 background subtraction as described in (Mindell and Grigorieff, 2003), a radial, cosine-edged  
102 mask is applied to the spectrum, and this masked version is used during search and refinement of  
103 defocus, astigmatism and phase shift parameters. The cosine is 0.0 at the origin, and 1.0 at a  
104 radius corresponding to  $1/4 \text{ \AA}^{-1}$ , and serves to emphasize high-resolution Thon rings, which are  
105 less susceptible to artefacts caused by imperfect background subtraction. For all outputs from the  
106 program (diagnostic image of the amplitude spectrum, 1D plots, etc.), the background-  
107 subtracted, but non-masked, version of the amplitude spectrum is used. (5) Users receive a  
108 warning if the box size of the amplitude spectrum and the estimated defocus parameters suggest  
109 that significant CTF aliasing occurred (Penczek et al., 2014).

110

111 *Particle picking*

112 Putative particles are found by matching to a soft-edged disk template. The use of a soft-edged  
113 disk template as opposed to structured templates has two main advantages. It greatly speeds up  
114 calculation, enabling picking in ‘real time’, and alleviates the problem of templates biasing the  
115 result of all subsequent processing towards those templates (Henderson, 2013; Subramaniam,  
116 2013; van Heel, 2013). Any bias that is introduced will be towards a featureless “blob” and will  
117 likely be obvious if present.

118 The picking is performed using an algorithm adapted from (Sigworth, 2004). Rather than  
119 describing it fully, we will emphasize here where we deviated from this algorithm. The user must  
120 specify three parameters: the radius of the template disk, the maximum radius of the particle,  
121 which sets the minimum distance between picks, and the detection threshold value, given as a  
122 number of standard deviations of the (Gaussian) distribution of scores expected if no particles  
123 were present in the input micrograph. Values of 1.0 to 6.0 for this threshold generally give  
124 acceptable results. All other parameters mentioned below can usually remain set to their default  
125 values.

126 Prior to matched filtering, micrographs are resampled by Fourier cropping to a pixel size of 15 Å  
127 (the user can override this by changing the “Highest resolution used in picking” value from its  
128 default 30 Å), and then filtered with a high-pass cosine-edged aperture to remove very low-  
129 frequency density ramps caused by variations in ice thickness.

130 The background noise spectrum of the micrograph is estimated by computing the average  
131 rotational power spectrum of 50 areas devoid of particles, and is then used to “whiten” the  
132 background (shot + solvent) noise of the micrograph. Normalization, including CTF effects, and  
133 matched filtering are then performed as described (Sigworth, 2004), except using a single  
134 reference image and no principal components’ decomposition.

135 One difficulty in estimating the background noise spectrum of the micrograph is to locate areas  
136 devoid of particles without a priori knowledge of their locations. Our algorithm first computes a  
137 map of the local variance and local mean in the micrograph (computed over the area defined by  
138 the maximum radius given by the user (Roseman, 2004; van Heel, 1982)) and the distribution of  
139 values of these mean and variance maps. The average radial power spectrum of the 50 areas of  
140 the micrograph with the lowest local variance is then used as an estimate of the background noise  
141 spectrum. Optionally, the user can set a different number of areas to be used for this estimate (for  
142 example if the density of particles is very high or very low) or use areas with local variances  
143 closest to the mode of the distribution of variances, which may also be expected to be devoid of  
144 particles.

145 Matched-filter methods are susceptible to picking high-contrast features such as contaminating  
146 ice crystals or carbon films. (Sigworth, 2004) suggests subtracting matched references from the  
147 extracted boxes and examining the remainder in order to discriminate between real particles and  
148 false positives. In the interest of performance, we decided instead to pick using a single artificial  
149 reference (disk) and to forgo such subtraction approaches. To avoid picking these kinds of  
150 artifacts, the user can choose to ignore areas with abnormal local variance or local mean. We find  
151 that ignoring high-variance areas often helps avoid edges of problematic objects, e.g. ice crystals  
152 or carbon foils, and that avoiding high- and low-mean areas helps avoid picking from areas  
153 within them, e.g. the carbon foil itself or within an ice crystal (Figure 3). The thresholds used are  
154 set to  $M_o + 2 FWHM$  for the variance and  $\pm (M_o + 2 FWHM)$  for the mean, where  $M_o$  is the  
155 mode and  $FWHM$  the full width at half-maximum of the distribution of the relevant statistic. For  
156 micrographs with additional phase plate phase shifts between  $0.1$  and  $0.9 \pi$ , where much higher  
157 contrast is expected, the variance threshold is increased to  $M_o + 8 FWHM$ . We have found that

158 in favorable cases many erroneous picks can be avoided. Remaining false-positive picks are  
159 removed later during 2D classification.

160 Because of our emphasis on performance, our algorithm can be run nearly instantaneously on a  
161 typical ~4K image, using a single processor. In the Action panel, the user is presented with an  
162 “Auto preview” mode to enable interactive adjustment of the picking parameters (Figure 3). In  
163 this mode, the micrograph is displayed with optional and adjustable low-pass and high-pass  
164 filters, and the results of picking using the currently selected parameters are overlaid on top.  
165 Changing one or more of the parameters leads to a fast re-picking of the displayed micrograph,  
166 so that the parameters can be optimized in real-time. Once the three main parameters have been  
167 adjusted appropriately, the full complement of input micrographs can be picked, usually in a few  
168 seconds or minutes.

169 A possible disadvantage of using a single disk template exists when the particles to be picked are  
170 non-uniform in size or shape (e.g. in the case of an elongated particle). In this case, it may be  
171 expected that a single template would have difficulty in picking all the different types and views  
172 of particles present, and that in this case using a number of different templates would lead to a  
173 more accurate picking. In practice, we found that with careful optimization of the parameters,  
174 elongated particles and particles with size variation (Figure 3) were picked adequately.

175 The underlying implementation of the algorithm supports multiple references as well as  
176 reference rotation. These features may be exposed to the graphical user interface in future  
177 versions, for example enabling the use of 2D class averages as picking templates, should the  
178 need arise.

179



180 *2D classification*

181 2D classification is a relatively quick and robust way to assess the quality of a single-particle  
182 dataset. *cisTEM* implements a maximum likelihood algorithm (Scheres et al., 2005) and  
183 generates fully CTF-corrected class averages that typically display clear high-resolution detail,  
184 such as secondary structure. Integration of the likelihood function is done by evaluating the  
185 function at defined angular steps  $d\alpha$  that are calculated according to

$$186 \quad d\alpha = R/D \quad (1)$$

187 where  $R$  is the resolution limit of the data and  $D$  is the diameter of the particle (twice the mask  
188 radius that is applied to the iteratively-refined class averages). *cisTEM* runs a user-defined  
189 number of iterations  $n$  defaulting to 20. To speed up convergence, the resolution limit is adjusted  
190 as a function of iteration cycle  $l$  ( $0 \leq l < n$ ):

$$191 \quad R = R_{start} + l(R_{finish} - R_{start})/(n - 1) \quad (2)$$

192 where  $R_{start}$  and  $R_{finish}$  are user-defined resolution limits at the first and last iteration,  
193 defaulting to 40 Å and 8 Å, respectively. The user also sets  $K$ , the number of classes to calculate.  
194 Depending on this number and the number of particles  $N$  in the dataset, only a percentage  $p$  of  
195 the particles are included in the calculation. These particles are randomly reselected for each  
196 iteration and  $p$  is typically small, for example 0.1, in the first 10 iterations ( $p_{0-9}$ ), then increases  
197 to 0.3 for iteration 10 to 14 ( $p_{10-14}$ ) and finishes with five iterations including all data ( $p_{15-19}$ ):

$$198 \quad p_{0-9} = \begin{cases} 300K/N, & 300K/N < 1 \\ 1, & 300K/N \geq 1 \end{cases}$$
$$199 \quad p_{10-14} = \begin{cases} 0.3, & p_{0-9} < 0.3 \\ p_{0-9}, & p_{0-9} \geq 0.3 \end{cases} \quad (3)$$

200 
$$p_{15-19} = 1$$

201 For example, for a dataset containing  $N = 100,000$  particles,  $p_{0-9} = 0.15$ , i.e. 15% of the data  
202 will be used to obtain  $K = 50$  classes. Apart from speeding up the calculation, the stepwise  
203 increase of the resolution limit and the random selection of subsets of the data also reduce the  
204 chance of overfitting (see also the calculation of ab-initio 3D reconstructions and 3D refinement  
205 below) and, therefore, increase the convergence radius of the 2D classification algorithm.

206 For the calculation of the likelihood function, the particle images  $\mathbf{X}_i$  are noise-whitened by  
207 dividing their Fourier transforms  $\mathcal{F}\{\mathbf{X}_i\}$  by the square root of the radially average noise power  
208 spectrum,  $NPS$ :

209 
$$\mathcal{F}\{\tilde{\mathbf{X}}_i\}(\mathbf{g}) = \mathcal{F}\{\mathbf{X}_i\}(\mathbf{g}) / \sqrt{NPS(g)} \quad (4)$$

210 where  $\mathbf{g}$  is the 2D reciprocal space coordinate and  $g = |\mathbf{g}|$  its magnitude. The noise power  
211 spectrum is calculated from the boxed particle images using the area outside the circular mask  
212 set by the user according to the expected particle size. To increase accuracy, it is further  
213 averaged across 2000 randomly selected particles. The background (density outside the mask) is  
214 further normalized by adding a constant to each particle that yields a background average of  
215 zero.

216 Finally, at the beginning of each iteration, noise features in the class averages  $\mathbf{A}_i$  are suppressed  
217 by resetting negative values below a threshold  $t_i$  to the threshold:

218 
$$t_i = -0.3 \max_j A_{i,j} \quad (5)$$

219 where  $j$  runs over all pixels in average  $\mathbf{A}_i$ .

220

221 *3D refinement (FrealignX)*

222 The refinement of 3D reconstructions in *cis*TEM uses a version of Frealign (Lyumkis et al.,  
223 2013) that was specifically designed to work with *cis*TEM. Most of Frealign’s control  
224 parameters are exposed to the user in the “Manual Refine” Action panel (Figure 4). The “Auto  
225 Refine” and “Ab-Initio” panels also use Frealign but manage many of the parameters  
226 automatically (see below). Frealign’s algorithm was described previously (Grigorieff, 2007;  
227 Lyumkis et al., 2013) and this section will mostly cover important differences, including a new  
228 objective function used in the refinement, different particle weighting used in reconstructions,  
229 optional likelihood-based blurring, as well as new masking options.

230 **Matched filter** To make Frealign compatible with *cis*TEM’s GUI, the code was completely  
231 rewritten in C++, and it will be referred to here as Frealign v10, or FrealignX. The new version  
232 makes use of a matched filter (McDonough and Whalen, 1995) to maximize the signal in cross  
233 correlation maps calculated between particle images and reference projections. This requires  
234 whitening of the noise present in the images and resolution-dependent scaling of the reference  
235 projections to match the signal in the noise-whitened images. Both can be achieved if the spectral  
236 signal-to-noise ratio (SSNR) of the data is known. As part of a 3D reconstruction, Frealign  
237 calculates the resolution-dependent *PSSNR*, the radially averaged SSNR present in the particle  
238 images before they are affected by the CTF (Sindelar and Grigorieff, 2012). Using *PSSNR* and  
239 the CTF determined for a particle, the SSNR in the particle image can be calculated as

240 
$$SNR(\mathbf{g}) = PSSNR(g) \times CTF^2(\mathbf{g}) \quad (6)$$

241 (as before,  $\mathbf{g}$  is the 2D reciprocal space coordinate and  $g = |\mathbf{g}|$ ). Here,  $SNR$  is defined as the  
 242 ratio of the variance of the signal and the noise. The Fourier transform  $\mathcal{F}\{\tilde{\mathbf{X}}_i\}$  of the noise-  
 243 whitened particle image  $\tilde{\mathbf{X}}_i$  can then be calculated as

$$244 \quad \mathcal{F}\{\tilde{\mathbf{X}}_i\}(\mathbf{g}) = \frac{\mathcal{F}\{\mathbf{X}_i\}(\mathbf{g})}{\sqrt{|\mathcal{F}\{\mathbf{X}_i\}|_r^2(g)}} \sqrt{1 + SNR(\mathbf{g})} \quad (7)$$

245 where  $\mathcal{F}\{\mathbf{X}_i\}$  is the Fourier transform of the original image  $\mathbf{X}_i$ ,  $|\cdot|$  is the absolute value, and  
 246  $|\mathcal{F}\{\mathbf{X}_i\}|_r^2$  is the radially averaged spectrum of the squared 2D Fourier transform amplitudes of  
 247 image  $\mathbf{X}_i$ . To implement Eq. (7), a particle image is first divided by its amplitude spectrum,  
 248 which includes power from both signal and noise, and then multiplied by a term that amplifies  
 249 the image amplitudes according to the signal strength in the image. The reference projection  $\mathbf{A}_i$   
 250 can be matched by calculating

$$251 \quad \mathcal{F}\{\tilde{\mathbf{A}}_i\}(\mathbf{g}) = \frac{\mathcal{F}\{\mathbf{A}_i\}(\mathbf{g})}{\sqrt{|\mathcal{F}\{\mathbf{A}_i\}|_r^2(g)}} \sqrt{SNR(\mathbf{g})} \quad (8)$$

252 Eq. (8) scales the variance of the signal in the reference to be proportional to the measured  
 253 signal-to-noise ratio in the noise-whitened images. The main term in the objective function  $O(\phi)$   
 254 maximized in FrealignX is therefore given by the cross-correlation function

$$255 \quad CC(\phi) = \frac{Re(\mathcal{F}_{R1,R3}\{\tilde{\mathbf{A}}_i(\phi)\}^* \mathcal{F}_{R1,R3}\{\tilde{\mathbf{X}}_i\})}{\|\mathcal{F}_{R1,R3}\{\tilde{\mathbf{A}}_i(\phi)\}\| \|\mathcal{F}_{R1,R3}\{\tilde{\mathbf{X}}_i\}\|} \quad (9a)$$

256 where  $\phi$  is a set of parameters describing the particle view, x,y position, magnification and  
 257 defocus,  $Re(\cdot)$  is the real part of a complex number,  $\|\cdot\|$  is the Euclidean norm, i.e. the square  
 258 root of the sum of the squared pixel values, and  $\mathcal{F}_{R1,R3}\{\cdot\}^*$  is the conjugate complex value of the  
 259 Fourier transform  $\mathcal{F}_{R1,R3}\{\cdot\}$ . The subscripts  $R1$  and  $R3$  specify the low- and high-resolution

260 limits of the Fourier transforms included in the calculation of Eq. (9a), as specified by the user.  
261 To reduce noise overfitting, the user has the option to specify also a resolution range in which the  
262 absolute value of the cross terms in the numerator of Eq. (9a) are used (Stewart and Grigorieff,  
263 2004), instead of the signed values (option “Signed CC Resolution Limit” under “Expert  
264 Options” in the “Manual Refine” Action panel). In this case

$$265 \quad CC(\phi) = \frac{\operatorname{Re}(\mathcal{F}_{R1,R2}\{\tilde{\mathbf{A}}_i(\phi)\}^* \mathcal{F}_{R1,R2}\{\tilde{\mathbf{X}}_i\}) + |\operatorname{Re}(\mathcal{F}_{R2,R3}\{\tilde{\mathbf{A}}_i(\phi)\}^* \mathcal{F}_{R2,R3}\{\tilde{\mathbf{X}}_i\})|}{\|\mathcal{F}_{R1,R3}\{\tilde{\mathbf{A}}_i(\phi)\}\| \|\mathcal{F}_{R1,R3}\{\tilde{\mathbf{X}}_i\}\|} \quad (9b)$$

266 where  $R2$  is specified by the “Signed CC Resolution Limit.” The objective function also includes  
267 a term  $R(\phi|\Theta)$  to restrain alignment parameters (Chen et al., 2009; Lyumkis et al., 2013;  
268 Sigworth, 2004), which currently only includes the x,y positions:

$$269 \quad R(\phi|\Theta) = -\frac{\sigma^2}{M} \left( \frac{(x-\bar{x})^2}{2\sigma_x^2} + \frac{(y-\bar{y})^2}{2\sigma_y^2} \right) \quad (10)$$

270 where  $\sigma$  is the standard deviation of the noise in the particle image and  $\Theta$  represents a set of  
271 model parameters including the average particle positions in a dataset  $\bar{x}$  and  $\bar{y}$ , and the standard  
272 deviations of the x,y positions from the average values,  $\sigma_x$  and  $\sigma_y$ , and  $M$  is the number of pixels  
273 in the mask applied to the particle before alignment. The complete objective function is therefore

$$274 \quad O(\phi) = CC(\phi) + R(\phi|\Theta) \quad (11)$$

275 The maximized values determined in a refinement are converted to particle scores by  
276 multiplication with 100.

277 **CTF refinement** FrealignX can refine the defocus assigned to each particle. This may be useful  
278 when particles have a size of about 400 kDa or larger. Depending on the quality of the sample  
279 and images, these particles may generate sufficient signal to yield per-particle defocus values

280 that are more accurate than the average defocus values determined for whole micrographs by  
281 CTFFIND4 (see above). Refinement is achieved by a simple one-dimensional grid search of a  
282 defocus offset applied to both defocus values determined in the 2D CTF fit obtained by  
283 CTFFIND4. FrealignX applies this offset to the starting values in a refinement, typically  
284 determined by CTFFIND4, and evaluates the objective function, Eq. (11), for each offset. The  
285 offset yielding the maximum is then used to assign refined defocus values. In a typical  
286 refinement, the defocus offset is searched in steps of 50 Å, in a range of  $\pm 500$  Å. In the case of  
287  $\beta$ -galactosidase (see below), a single round of defocus refinement changed the defocus on  
288 average by 60 Å; the RMS change was 80 Å. The refinement produced a marginal improvement  
289 of 0.05 Å in the Fourier Shell Correlation (FSC) threshold of 0.143, suggesting that the defocus  
290 values determined by CTFFIND4 were already close to optimal. In a different dataset of  
291 rotavirus double layered particles, a single round of defocus refinement changed the defocus on  
292 average by 160 Å; the RMS change was 220 Å. In this case the refinement increased the  
293 resolution from  $\sim 3.0$  Å to  $\sim 2.8$  Å.

294 **Masking** FrealignX has a 3D masking function to help in the refinement of structures that  
295 contain significant disordered regions, such as micelles in detergent-solubilized membrane  
296 proteins. To apply a 3D mask, the user supplies a 3D map that will be binarized by setting to  
297 zero all voxel values less than or equal to zero, and all others to 1 to indicate that they are inside  
298 the masked region. A soft cosine-shaped falloff of specified width (e.g. 10 Å) is then applied to  
299 soften the edge of the masked region and avoid sharp edges when the mask is applied to a 3D  
300 reconstruction. Voxels of the masked reconstruction that fall outside the mask can be set to zero,  
301 or to a low-pass filtered version of the original density, optionally downweighted by  
302 multiplication by a scaling factor set by the user. At the edge of the mask, the low-pass filtered

303 density is blended with the unfiltered density inside the mask to produce a smooth transition.  
304 Figure 5 shows the result of masking the reconstruction of an ABC transporter associated with  
305 antigen processing (TAP, (Oldham et al., 2016)). The mask was designed to contain only density  
306 corresponding to protein and the outside density was low-pass filtered at 30 Å resolution and  
307 kept with a weight of 100% in the final masked reconstruction. The combination of masking and  
308 low-pass filtering in this case keeps a low-pass filtered version of the density outside the mask in  
309 the reconstruction, including the detergent micelle. Detergent micelles can be a source of noise in  
310 the particle images because the density represents disordered material. However, at low, 20 to 30  
311 Å resolution, micelles generate features in the images that can help in the alignment of the  
312 particles. In the case of TAP, this masking helped obtain a reconstruction at 4 Å resolution  
313 (Oldham et al., 2016).

314 **3D reconstruction** In Frealign, a 3D reconstruction  $\mathbf{V}_k$  of class average  $k$  and containing  $N$   
315 images is calculated as (Lyumkis et al., 2013; Sindelar and Grigorieff, 2012)

$$316 \quad \mathbf{V}_k = \mathcal{F}^{-1} \left\{ \frac{\sum_{i=1}^N \frac{q_{ik} \mathcal{R}(\phi_i, w_{ik} \cdot CTF_i \cdot \mathcal{F}\{\hat{\mathbf{X}}_i\})}{\sigma_i^2}}{\left( \sum_{i=1}^N \frac{q_{ik} \mathcal{R}(\phi_i, w_{ik} \cdot CTF_i^2)}{\sigma_i^2} \right) + 1/PSSNR_k} \right\} \quad (12)$$

317 where  $q_{ik}$  is the probability of particle  $i$  belonging to class  $k$ ,  $\sigma_i$  is the standard deviation of the  
318 noise in particle image  $i$ ,  $\phi_i$  are its alignment parameters,  $w_{ik}$  the score-based weights (Eq. (14),  
319 see below),  $CTF_i$  the CTF of the particle image,  $\mathcal{R}(\phi_i, \cdot)$  the reconstruction operator merging  
320 data into a 3D volume according to alignment parameters  $\phi_i$ ,  $PSSNR$  the radially averaged  
321 particle SSNR derived from the FSC between half-maps (Sindelar and Grigorieff, 2012),  $\hat{\mathbf{X}}_i$   
322 noise-whitened image  $i$ , and  $\mathcal{F}^{-1}\{\cdot\}$  the inverse Fourier transform. For the calculation of the 3D  
323 reconstructions, as well as 3D classification (see below) the particle images are not whitened

324 according to Eq. (7). Instead, they are whitened using the radially- and particle-averaged power  
325 spectrum of the background around the particles:

$$326 \quad \mathcal{F}\{\hat{\mathbf{X}}_i\}(\mathbf{g}) = \frac{\mathcal{F}\{\mathbf{X}_i\}(\mathbf{g})}{\sqrt{|\mathcal{F}\{B(\mathbf{X}_i)\}|_r^2(g)}} \quad (13)$$

327 where  $B(\mathbf{X}_i)$  is a masked version of image  $\mathbf{X}_i$  with the area inside a circular mask centered on the  
328 particle replaced with the average values at the edge of the mask, and scaled variance to produce  
329 an average pixel variance of 1 in the whitened image  $\hat{\mathbf{X}}_i$ . Using the procedure in Eq. (13) has the  
330 advantage that whitening does not depend on the knowledge of the SSNR of the data, and  
331 reconstructions can therefore be calculated even when the SSNR is not known.

332 **Score-based weighting** In previous versions of Frealign, resolution-dependent weighting was  
333 applied to the particle images during reconstruction (the Frealign parameter was called “PBC”,  
334 (Grigorieff, 2007)). The weighting function took the form of a B-factor dependent exponential  
335 that attenuates the image data at higher resolution. FrealignX still uses B-factor weighting but the  
336 weighting function is now derived from the particle scores (see above) as

$$337 \quad w(\text{score}, \mathbf{g}) = e^{-\frac{BSC}{4}(\text{score} - \overline{\text{score}})g^2} \quad (14)$$

338  $BSC$  converts the difference between a particle score and the average particle score,  $\overline{\text{score}}$ , into a  
339 B-factor. Setting  $BSC$  to zero will turn off score-based particle weighting. Typical values for  
340  $BSC$  that produce reasonable discrimination between high-scoring and low-scoring particles are  
341 between 2 and 10 Å<sup>2</sup>.

342 **3D Classification** FrealignX uses a maximum-likelihood approach for 3D classification  
343 (Lyumkis et al., 2013). Assuming that all images were noise-whitened according to Eq. (13),  
344 which scales the variance of each image such that the average standard deviation of the noise in a



345 pixel is 1, the probability density function (PDF) of observing image  $\mathbf{X}_i$ , given alignment  
 346 parameters  $\phi_i$  and reconstruction  $\mathbf{V}_k$ , is calculated as (Lyumkis et al., 2013)

$$347 \quad \Gamma(\mathbf{X}_i | \phi_{ik}, \mathbf{V}_k) = \left(\frac{1}{2\pi}\right)^{\tilde{M}} \exp\left[-\frac{\|\hat{\mathbf{X}}_i - \wp(\mathbf{V}_k, \phi_{ik})\|_{\tilde{M}}^2}{2}\right] \gamma(\phi_{ik} | \Theta_k). \quad (15)$$

348 As before,  $\phi_{ik}$  are the alignment parameters (usually just Euler angles and x,y shifts) determined  
 349 for image  $i$  with respect to class average  $k$ ,  $\wp$  is the projection operator producing an aligned 2D  
 350 projection of reconstruction  $\mathbf{V}_k$  according to parameters  $\phi_{ik}$ ,  $\|\hat{\mathbf{X}}_i - \wp(\mathbf{V}_k, \phi_{ik})\|_{\tilde{M}}^2$  is the sum of  
 351 the squared pixel value differences between whitened image  $\hat{\mathbf{X}}_i$  and the reference projection  
 352 inside a circular mask defining the area of the particle with user-defined diameter,  $\tilde{M}$  is the  
 353 number of pixels inside this mask, and  $\gamma(\phi_{ik} | \Theta_k)$  is a hierarchical prior describing the  
 354 probability of observing alignment parameters  $\phi_{ik}$  given model parameters  $\Theta_k$  (see Eq. (10)).  
 355 Given the joint probability, Eq. (15), determined in a refinement, the probability  $q_{ik}$  of particle  $i$   
 356 belonging to class  $k$  can be updated as (Lyumkis et al., 2013)

$$357 \quad q_{ik} = \frac{\Gamma(\mathbf{X}_i | \Theta_{ik}, \mathbf{V}_k) \pi_k}{\sum_{k=1}^K \Gamma(\mathbf{X}_i | \Theta_{ik}, \mathbf{V}_k) \pi_k} \quad (16)$$

358 where the summation in the denominator is taken over all classes and the average probabilities  
 359  $\pi_k$  for a particle to belong to class  $k$  are given by the average values of  $q_{ik}$  determined in a prior  
 360 iteration, calculated for the entire dataset of  $N$  particles:

$$361 \quad \pi_k = \frac{1}{N} \sum_{i=1}^N q_{ik} \quad (17)$$

362 An example of 3D classification is shown in Figure 6 for F<sub>1</sub>F<sub>0</sub>-ATPase, revealing different  
 363 conformational states of the  $\gamma$  subunit (Zhou et al., 2015).

364 **Focused classification** 3D classification can be improved by focusing on conformationally- or  
365 compositionally-variable regions of the map. To achieve this, a mask is applied to the particle  
366 images and reference projections, the area of which is defined as the projection of a sphere with  
367 user-specified center (within the 3D reconstruction) and radius. This 2D mask is therefore  
368 defined independently for each particle, as a function of its orientation. When using focused  
369 classification,  $\tilde{M}$  in Eq. (15) is adjusted to the number of pixels inside the projected mask and the  
370 sum of the squared pixel value differences in Eq. (15) is limited to the area of the 2D mask. By  
371 applying the same mask to image and reference, only variability inside the masked region is used  
372 for 3D classification. Other regions of the map are ignored, leading to a “focusing” on the region  
373 of interest. The focused mask also excludes noise contained in the particle images outside the  
374 mask and therefore improves classification results that often depend on detecting small  
375 differences between particles and references. A typical application of a focused mask is in the  
376 classification of ribosome complexes that may exhibit localized conformational and/or  
377 compositional variability, for example the variable conformations of an IRES (Abeyrathne et al.,  
378 2016) or different states of tRNA accommodation (Loveland et al., 2017).

379 **Likelihood-based blurring** In some cases, the convergence radius of refinement can be  
380 improved by blurring the reconstruction according to a likelihood function. This procedure is  
381 similar to the maximization step in a maximum likelihood approach (Scheres, 2012). The  
382 likelihood-blurred reconstruction is given by

$$383 \mathbf{V}_k^n = \frac{\sum_{i=1}^N \frac{1}{\sigma_i^2} \int_{\phi_{\alpha xy}} \Gamma(\mathbf{X}_i | \phi_i, \mathbf{V}_k^{n-1}) \mathcal{R}(\phi_i, w_i \cdot CTF_i \cdot \mathbf{X}_i) d\phi_{\alpha xy}}{\sum_{i=1}^N \frac{q_{ik}}{\sigma_i^2} \mathcal{R}(\phi_i, w_i \cdot CTF_i^2) + 1/PSSNR_k} \quad (18)$$

384 where, in the case of FrealignX,  $\phi_{axy}$  only includes the x,y particle positions and in-plane  
385 rotation angle  $\alpha$ , which are a subset of the alignment parameters  $\phi_i$ , and  $\mathbf{V}_k^{n-1}$  is the  
386 reconstruction from an earlier refinement iteration. As before,  $\Gamma(\mathbf{X}_i|\phi_i, \mathbf{V}_k^{n-1})$  is the probability  
387 of observing image  $i$ , given alignment parameters  $\phi_i$  and reconstruction  $\mathbf{V}_k^{n-1}$ . Integration over  
388 these three parameters can be efficiently implemented and, therefore, does not produce a  
389 significant additional computational burden.

390 **Resolution assessment** The resolution of reconstructions generated by FrealignX is assessed  
391 using the FSC criterion (Harauz and van Heel, 1986). FSC curves in *cis*TEM are calculated using  
392 two reconstructions (“half-maps”) calculated either from the even-numbered and odd-numbered  
393 particles, or by dividing the dataset into 100 equal subsets and using the even- and odd-numbered  
394 subsets to calculate the two reconstructions (in the *cis*TEM GUI, the latter is always used). The  
395 latter method has the advantage that accidental duplication of particles in a stack is less likely to  
396 affect the FSC calculation. All particles are refined against a single reference and, therefore, the  
397 calculated FSC values may be biased towards higher values (Grigorieff, 2000; Stewart and  
398 Grigorieff, 2004). This bias extends slightly beyond the resolution limit imposed during  
399 refinement, by approximately  $2/D_{mask}$ , where  $D_{mask}$  is the mask radius used to mask the  
400 reconstructions (see above). During auto-refinement (see below), the resolution limit imposed  
401 during refinement is carefully adjusted to stay well below the estimated resolution of the  
402 reconstruction and the resolution estimate is therefore unbiased (Scheres and Chen, 2012).  
403 However, users have full control over all parameters during manual refinement and will have to  
404 make sure that they do not bias the resolution estimate by choosing a resolution limit that is close  
405 to, or higher than, the estimated resolution of the final reconstruction. Calculated FSC curves are

406 smoothed using a Savitzky–Golay cubic polynomial that reduces the noise often affecting FSC  
407 curves at the high-resolution end.

408 The FSC calculated between two density maps is dependent on the amount of solvent included  
409 inside the mask applied to the maps. A larger mask that includes more solvent background will  
410 yield lower FSC values than a tighter mask. To obtain an accurate resolution estimate in the  
411 region of the particle density, one possibility is to apply a tight mask that closely follows the  
412 boundary of the particle. This approach bears the risk of generating artifacts because the particle  
413 boundary is not always well defined, especially when the particle includes disordered domains  
414 that generate weak density in the reconstruction. The approach in Frealign avoids tight masking  
415 and instead calculates an FSC curve using generously masked density maps, corrected for the  
416 solvent content inside the mask (Sindelar and Grigorieff, 2012). The corrected FSC curve is  
417 referred to as *Part\_FSC* and is calculated from the uncorrected  $FSC_{uncor}$  as (Oldham et al.,  
418 2016)

$$419 \quad Part\_FSC_{half-maps} = \frac{fFSC_{uncor}}{1+(f-1)FSC_{uncor}}, \quad (19)$$

420 where  $f$  is the ratio of mask volume to estimated particle volume. The particle volume can be  
421 estimated from its molecular mass  $M_w$  as  $\frac{\text{\AA}^3}{0.81\text{Da}} M_w$  (Matthews, 1968). Eq. (19) assumes that  
422 both maps have similar SSNR values, as is normally the case for the two reconstructions  
423 calculated from two halves of the dataset, indicated by the subscript *half – maps*. If one of the  
424 maps does not contain noise from solvent background, for example when calculating the FSC  
425 between a reconstruction and a map derived from an atomic model, the solvent-corrected FSC is  
426 given as

427 
$$Part\_FSC_{model-map} = \sqrt{\frac{fFSC_{uncor}^2}{1+(f-1)FSC_{uncor}^2}} \quad (20)$$

428 **Speed optimization** FrealignX has been optimized for execution on multiple CPU cores. Apart  
429 from using optimized library functions for FFT calculation and vector multiplication (Intel Math  
430 Kernel Library), the processing speed is also increased by on-the-fly cropping in real and  
431 reciprocal space of particle images and 3D reference maps. Real-space cropping reduces the  
432 interpolation accuracy in reciprocal space and is therefore limited to global parameter searches  
433 that do not require the highest accuracy in the calculation of search projections. Reciprocal-space  
434 cropping is used whenever a resolution limit is specified by the user or in an automated  
435 refinement (ab-initio 3D reconstruction and auto-refinement). For the calculation of in-plane  
436 rotated references, reciprocal-space padding is used to increase the image size four-fold,  
437 allowing fast nearest-neighbor resampling in real space with sufficient accuracy to produce  
438 rotated images with high fidelity.

439

#### 440 *Ab-initio 3D reconstruction*

441 Ab-initio reconstruction offers a convenient way to proceed from single particle images to a 3D  
442 structure when a suitable reference is not available to initialize 3D reconstruction and refinement.  
443 Different ab-initio methods have been described (Hohn et al., 2007; Punjani et al., 2017; Reboul  
444 et al., 2018) and *cis*TEM's implementation follows a strategy published originally by (Grigorieff,  
445 2016). It is based on the premise that iterative refinement of a reconstruction initialized with  
446 random angular parameters is likely to converge on the correct structure if overfitting is avoided  
447 and the refinement proceeds in small steps to reduce the chance of premature convergence onto

448 an incorrect structure. The procedure is implemented as part of *cis*TEM’s GUI and uses  
449 FrealignX to perform the refinements and reconstructions.

450 After initialization with random angles, *cis*TEM performs a user-specified number of global  
451 alignment parameter searches, recalculating the reconstruction after each search and applying an  
452 automatic masking procedure to it before the next global search. Similar to 2D classification (see  
453 above), only a randomly selected subset of the data is used in each iteration and the resolution  
454 limit applied during the search is increased with every iteration. The number of iterations  $n$   
455 defaults to 40, the starting and final resolution limits  $R_{start}$  and  $R_{finish}$  default to 20 Å and 8 Å,  
456 respectively, and the starting and final percentage of included particles in the reconstruction,  
457  $p_{start}$  and  $p_{finish}$  default to  $2500K/N$  and  $10,000K/N$ , respectively (results larger than 1 are  
458 reset to 1), with  $K$  the number of 3D classes to be calculated as specified by the user, and  $N$  the  
459 number of particles in the dataset. If symmetry is being applied,  $N$  is replaced by  $NO_{sym}$  where  
460  $O_{sym}$  is the number of asymmetric units present in one particle. The resolution limit is then  
461 updated in each iteration  $l$  as in Eq. (2), and the percentage is updated as

$$462 \quad p = p_{start} + l(p_{finish} - p_{start})/(n - 1), \quad (21)$$

463 again resetting results larger than 1 to 1. *cis*TEM actually performs a global search for a  
464 percentage  $3p$  of the particle stack, i.e. three times as many particles as are included in the  
465 reconstructions for each iteration. The particles included in the reconstructions are then chosen to  
466 be those with the highest scores as calculated by FrealignX.

467 The global alignment parameters are performed using the “general” FrealignX procedure with  
468 the following changes. Firstly, the *PSSNR* is not directly estimated from the FSC calculated at  
469 each round. Instead, for the first 3 iterations, a default *PSSNR* is calculated based on the

470 molecular weight. From the 4<sup>th</sup> iteration onwards, the *PSSNR* is calculated from the FSC,  
471 however if the calculated *PSSNR* is higher than the default *PSSNR*, the default *PSSNR* is taken  
472 instead. This is done in order to avoid some of the overfitting that will occur during the  
473 refinements. Secondly, during a normal global search the top *h* (where *h* defaults to 20) results  
474 of the grid search are locally refined, and the best locally refined result is taken. In the ab-initio  
475 procedure, however, the result of the global search for a given particle image is taken randomly  
476 from all results that have a score which lies in the top 15% of the difference between the worst  
477 score and the best score.

478 During the reconstruction steps, the calculated  $\sigma$  for each particle is reset to 1 prior to 3D  
479 reconstruction and score weighting is disabled. This is done because the  $\sigma$  and score values are  
480 not meaningful until an approximately correct solution is obtained.

481 The reconstructions are automatically masked before each new refinement iteration to suppress  
482 noise features that could otherwise be amplified in subsequent iterations. The same masking  
483 procedure is also applied during auto-refinement (see below). It starts by calculating the density  
484 average  $\bar{\rho}$  of the reconstruction and resetting all voxel values below  $\bar{\rho}$  to  $\bar{\rho}$ . This thresholded  
485 reconstruction is then low-pass filtered at 50 Å resolution and turned into a binary mask by  
486 setting densities equal or below a given threshold *t* to zero and all others to 1. The threshold is  
487 calculated as

$$488 \quad t = \bar{\rho}_{filtered} + 0.03(\bar{\rho}_{max\_500} - \bar{\rho}_{filtered}) \quad (22)$$

489 where  $\bar{\rho}_{filtered}$  is the density average of the low-pass filtered map and  $\bar{\rho}_{max\_500}$  is the average of  
490 the 500 highest values in the filtered map. The largest contiguous volume in this binarized map is  
491 then identified and used as a mask for the original thresholded reconstruction, such that all

492 voxels outside of this mask will be set to  $\bar{\rho}$ . Finally, a spherical mask, centered in the  
493 reconstruction box, is applied by resetting all densities outside the mask to zero.

494 The user has the option to repeat the ab-initio procedure multiple times using the result from the  
495 previous run as the starting map in each new run, to increase the convergence radius if necessary.

496 In the case of symmetric particles, the default behavior is to perform the first 2/3<sup>rd</sup>s of the  
497 iterations without applying symmetry. The non-symmetrized map is then aligned to the expected  
498 symmetry axes and the final 1/3<sup>rd</sup> of the iterations are carried out with the symmetry applied.

499 This default behavior can be changed by the user such that symmetry is always applied, or is  
500 never applied.

501 Alignment of the model to the symmetry axes is achieved using the following process. First, 3  
502 direction are chosen. These directions are kept constant through the rest of the process. Next, a  
503 brute force grid search over rotations around the x, y and z axes is set up. At each position on the  
504 grid the 3D map is rotated using the current x, y and z parameters, and then its projection along  
505 the 1<sup>st</sup> direction is calculated. The symmetry-related projections for this direction are then  
506 calculated, and for each one a cross-correlation map is calculated using the original projection as  
507 a reference, and the peak within this map is found. This process is then repeated for the other 2  
508 directions and the sum of all of the peak heights across all directions is calculated. The x,y,z  
509 rotations that result in the largest sum of all peaks is taken as the final rotation result. Shifts for  
510 this rotation are then calculated based on the found 2D x,y shifts between the initial and  
511 symmetry related projections, with the z shift being set to 0 for C symmetries. The symmetry  
512 alignment is also included as a command-line program, which can be used to align a volume to  
513 the symmetry axis when the ab-initio is carried out in C1 only, or when using a reference  
514 obtained by some other means.



515

516 *Automatic refinement*

517 Like ab-initio 3D reconstruction, auto-refinement makes use of randomly selected subsets of the  
518 data and of increasing resolution limit as refinement proceeds. However, unlike the ab-initio  
519 procedure, the percentage of particles  $p_l$  and the resolution limit  $R_l$  used in iteration  $l$  depend on  
520 the resolution of the reconstructions estimated on iteration  $l - 1$ . When the estimated resolution  
521 improved in the previous cycle,

522 
$$p_l = \max[p_R, p_{l-1}] \quad (23)$$

523 with

524 
$$p_R = 8000K e^{75/R_{l-1}^2} / N \quad (24)$$

525 where  $K$  is the number of 3D classes to be calculated and  $N$  the number of particles in the  
526 dataset. As before, if the particle has symmetry,  $N$  is replaced by  $N O_{sym}$  where  $O_{sym}$  is the  
527 number of asymmetric units present in one particle. If the calculated  $p_l$  exceeds 1, it is reset to 1.  
528 The resolution limit is estimated as

529 
$$R = FSC_{0.5} - 2/D_{mask} \quad (25)$$

530 where  $FSC_{0.5}$  is the point at which the FSC, unadjusted for the solvent within the mask (see  
531 above) crosses the 0.5 threshold and  $D_{mask}$  is the user-specified diameter of the spherical mask  
532 applied to the 3D reference at the beginning of each iteration, and to the half-maps used to  
533 calculate the FSC. The term  $2/D_{mask}$  accounts for correlations between the two half-maps due  
534 to the masking (see above). When the resolution did not improve in the previous iteration,

535 
$$p_l = 1.5p_{l-1} \quad (26)$$

536 (reset to 1 if resulting in a value larger than 1). At least five refinement iterations are run and  
537 refinement stops when  $p_l$  reaches 1 (all particles are included) and there was no improvement in  
538 the estimated resolution for the last three iterations.

539 If multiple classes are refined, the resolution limit in Eq. (25) is set independently for each class,  
540 however the highest resolution used for classification is fixed at 8 Å. At least nine iterations are  
541 run and refinement stops when  $p_l$  reaches 1, the average change in the particle occupancy in the  
542 last cycle was 1% or less, and there was no improvement in the estimated resolution for the last  
543 three iterations.

544 In a similar manner to the ab-initio procedure,  $\sigma$  values for each particle are set to 1 and score  
545 weighting is turned off. This is done until the refinement resolution is better than 7 Å, at which  
546 point it is assumed the model is of a reasonable quality.

547

#### 548 *Map sharpening*

549 Most single-particle reconstructions require some degree of sharpening that is usually achieved  
550 by applying a negative B-factor to the map. *cisTEM* includes a map sharpening tool that allows  
551 the application of an arbitrary B-factor. Additionally, maps can be sharpened by whitening the  
552 power spectrum of the reconstruction beyond a user-specified resolution (the default is 8 Å). The  
553 whitening amplifies terms at higher resolution similar to a negative B-factor but avoids the over-  
554 amplification at the high-resolution end of the spectrum that sometimes occurs with the B-factor  
555 method due to its exponential behavior. Whitening is applied after masking of the map, either  
556 with a hollow spherical mask of defined inner and outer radius, or with a user-defined mask

557 supplied as a separate 3D volume. The masking removes background noise and makes the  
558 whitening of the particle density more accurate. Both methods can be combined in *cis*TEM,  
559 together with a resolution limit imposed on the final reconstruction. The whitened and B-factor-  
560 sharpened map can optionally be filtered with a figure-of-merit curve calculate using the FSC  
561 determined for the reconstruction (Rosenthal and Henderson, 2003; Sindelar and Grigorieff,  
562 2012).

563

#### 564 *GUI design and workflow*

565 *cis*TEM's GUI required extensive development because it is an integral part of the processing  
566 pipeline. GUIs have become more commonplace in cryo-EM software tools to make them more  
567 accessible to users (Conesa Mingo et al., 2018; Desfosses et al., 2014; Punjani et al., 2017;  
568 Scheres, 2012; Tang et al., 2007). Many of the interfaces are designed as so-called wrappers of  
569 command-line driven tools, i.e. they take user input and translate it into a command line that  
570 launches the tool. Feedback to the user takes place by checking output files, which are also the  
571 main repository of processing results, such as movie frame alignments, image defocus  
572 measurements and particle alignment parameters. As processing strategies become more  
573 complex and the number of users new to cryo-EM grows, the demands on the GUI increase in  
574 the quest for obtaining the best possible results. Useful GUI functions include guided user input  
575 (so-called wizards) that adjust to specific situations, graphical presentation of relevant results,  
576 user interaction with running processes to allow early intervention and make adjustments, tools  
577 to manipulate data (e.g. masking), implementation of higher-level procedures that combine more  
578 primitive processing steps to achieve specific goals, and a global searchable database that keeps  
579 track of all processing steps and result. While some of these functions can be or have been

580 implemented in wrapper GUIs, the lack of control of these GUIs over the data and processes  
581 makes a reliable implementation more difficult. For example, keeping track of results from  
582 multiple processing steps, some of them perhaps repeated with different parameters or run many  
583 times during an iterative refinement, can become challenging if each step produces a separate  
584 results file. Communicating with running processes via files can be slow and is sometimes  
585 unreliable due to file system caching. Communication via files may complicate the  
586 implementation of higher-level procedures, which rely on the parsing of results from the more  
587 primitive processing steps.

588 The *cisTEM* GUI is more than a wrapper as it implements some of the new algorithms in the  
589 processing pipeline directly, adjusting the input of running jobs as the refinement proceeds. It  
590 enables more complex data processing strategies by tracking all results in a single searchable  
591 database. All processing steps are run and controlled by the GUI, which communicates with  
592 master and slave processes through TCP/IP. *cisTEM* uses a SQL database to store all results  
593 (except image files), offers input functions that guide the user or set appropriate defaults, and  
594 implements more complex procedures to automate processing where possible. *cisTEM*'s design  
595 is flexible to allow execution in many different environments, including single workstations,  
596 multiple networked workstations and large computer clusters.

597 User input and the display of results is organized into different panels that make up *cisTEM*'s  
598 GUI, each panel dedicated to specific processing steps (for examples, see Figure 1, 3, 4). This  
599 design guides users through a standard workflow that most single particle projects follow: movie  
600 alignment, CTF determination, particle picking, 2D classification, 3D reconstruction, refinement  
601 and classification, and sharpening of the final reconstructions. Three types of panels exist,  
602 dealing with Assets, Actions and Results. Assets are mostly data that can be used in processing

603 steps called Actions. They include Movies, Images, Particle Positions and Volumes. One type of  
604 Asset, a Refinement Package, defines the data and parameters necessary to carry out refinement  
605 of a 3D structure (or a set of structures if 3D classification is done), it contains a particle stack, as  
606 well as information about the sample (e.g. particle size and molecular weight) along with  
607 parameters for each particle (e.g. orientations and defocus values). Actions comprise the above  
608 mentioned workflow steps, with additional options for ab-initio 3D reconstruction, as well as  
609 automatic and manual 3D refinement to enable users to obtain the best possible results from their  
610 data. The results of most of these Actions are stored in the database and can be viewed in the  
611 related Results panels, which display relevant data necessary to evaluate the success of each  
612 processing step. Movie alignment, 3D refinement and reconstruction also produce new Image  
613 and Volume Assets, respectively.

614 Importing or generating new Assets is accomplished by wizards that solicit the necessary user  
615 input and perform checks where possible to avoid nonsensical input. In the more complex case of  
616 creating a new Refinement Package Asset, the wizard allows the specification of input data, for  
617 example based on particle picking results or the selection of 2D and 3D classes. Once an Action  
618 has been launched, results are displayed as soon as they become available, together with an  
619 overall progress bar, giving users an estimate of how long a processing step will take and of  
620 whether the results are as expected. If desired, an Action can be aborted and restarted with a  
621 different set of parameters, or the Action can be run again after regular termination to test  
622 different parameters. In the latter case, all prior results remain accessible and users can specify  
623 those to be used for the next step in the workflow. This provides users with the flexibility to pick  
624 and choose the best results in cases where different parts of a dataset require different settings to  
625 yield optimal results.

626

627 *Parallelization*

628 *cis*TEM uses a home-grown scheme to accelerate processing in parallel environments. Image  
629 processing of single-particle data is an embarrassingly parallel problem, i.e. the parallelization of  
630 most tasks can be achieved simply by dividing the data to be processed into smaller chunks that  
631 are each processed by a separate program thread, without the need for inter-process  
632 communication. Only certain steps require merging of data, such as the calculation of a 3D  
633 reconstruction from the entire dataset. *cis*TEM parallelizes processing steps by running multiple  
634 instances of the same program, each dealing with a subset of the data, then directly  
635 communicating with the launched processes over TCP/IP sockets. This enables the *cis*TEM GUI  
636 to distribute jobs and receive results in real time. Communication is directed through a  
637 “manager” process, which enables jobs to be run on a cluster, while the GUI itself can run on a  
638 local workstation

639 Another advantage of using a home-grown scheme over existing schemes (e.g. MPI) occurs  
640 when jobs are run on a multi-node computing cluster. In this case, jobs will complete even if the  
641 full number of requested processors is not available. For example, if a user requests 300 CPUs  
642 for a processing step but only 100 are available, *cis*TEM launches 300 jobs of which 200 will  
643 remain in the job scheduler’s queue. Data processing starts immediately with the 100 jobs that  
644 are allowed to run and will complete even if the remaining jobs never run. In such a scenario, an  
645 MPI-based job could only run when 300 CPUs become available, potentially delaying execution.  
646 In the few cases where a step requires merging of an entire dataset, for example in a 3D  
647 reconstruction, parallelization is achieved by calculating multiple intermediate 3D  
648 reconstructions for subsets of the data, dumping the intermediate reconstructions to disk and

649 merging them after all reconstruction jobs have finished. It can therefore help to designate a fast  
650 disk as a scratch disk to allow rapid dumping and reading of the relatively large files (200 MB –  
651 5 GB).

652

### 653 *Benchmarking with $\beta$ -galactosidase*

654 A high-resolution dataset of  $\beta$ -galactosidase (Bartesaghi et al., 2015) has been used to  
655 benchmark Relion 2 (Kimanius et al., 2016) and is also used here to illustrate the workflow of  
656 *cis*TEM and assess the time for the completion of different processing steps. The entire dataset  
657 was downloaded from the EMPIAR database (Iudin et al., 2016) and consists of 1539 movies  
658 containing 38 frames, recorded at super-resolution on a K2 Summit camera (Gatan, Inc.,  
659 Pleasanton, CA) and stored locally as tif files using LZW compression (the conversion to tiff and  
660 compression was performed by mrc2tif (Mastronarde and Held, 2017)). The pixel size of the  
661 super-resolution frames was 0.3185 Å, and images were binned to a pixel size of 0.75 Å after  
662 movie processing. For 2D classification and ab-initio 3D reconstruction, particles were boxed  
663 using 384 x 384 pixel boxes. For auto- and manual refinement, the particles were re-boxed into  
664 648 x 648 pixel boxes (boxing is part of the creation of Refinement Packages, see above). For all  
665 processing steps, a Dell Precision T7910 workstation containing two E5-2699 v4 Xeon  
666 processors with a total of 44 cores was used. Processing parameters were left on default settings  
667 except for the CTF determination, which was performed at 3.5 Å resolution using the movie  
668 averages instead of the frames, and particle picking, which used optimized parameters based on  
669 previewing a few selected images (Figure 3). The data were stored on a local SSD Raid 0 disk  
670 for fast access. Table 1 lists the timings of the different processing steps using all 44 CPU cores.  
671 Results obtained at different points in the workflow are shown in Figure 7.

672

| Processing step             | Details                                             | Time (hours) |
|-----------------------------|-----------------------------------------------------|--------------|
| Movie processing            | 1539 movies, 38 frames, super-resolution            | 1.1          |
| CTF determination           | Using aligned movie average as input                | 0.1          |
| Particle picking            | 131,298 particles                                   | 0.1          |
| 2D classification           | 50 classes, 28 selected with 119,523 particles      | 0.8          |
| Ab initio 3D reconstruction | 40 iterations                                       | 0.8          |
| Auto refinement             | 8 iterations, final resolution 2.2 Å                | 1.4          |
| Manual refinement           | 1 iteration (incl. defocus), final resolution 2.2 Å | 0.4          |
| <b>Total</b>                |                                                     | <b>4.7</b>   |

673

674 **Table 1** Benchmarking of *cis*TEM using a high-resolution dataset of  $\beta$ -galactosidase (Bartesaghi  
675 et al., 2015).

676

## 677 **Discussion**

678 The implementation of a complete image processing workflow in *cis*TEM offers users a uniform  
679 experience and guarantees smooth transitions between processing steps. It also helps developers  
680 maintain the software as all the tools and algorithms are developed in-house.



681 The main focus of *cis*TEM is on the processing of single-particle cryo-EM data and high-  
682 resolution 3D reconstruction. Future releases of *cis*TEM may include particle-based movie  
683 alignment, support for helical particles, improved 3D masking tools, more reliable resolution and  
684 quality indicators, as well as miscellaneous tools such as the determination of the detective  
685 quantum efficiency of electron detectors.

686 Since *cis*TEM does not rely on third-party libraries, such as Python, MPI or CUDA, that usually  
687 have to be installed and compiled separately on the target system, ready-to-run binaries can be  
688 made available for download that are optimized for different architectures. Using the wxWidgets  
689 library also means that *cis*TEM can be compiled for different operating systems, including  
690 Linux, Windows and OSX. Using a configure script, different options for the fast Fourier  
691 transforms (FFTs) can be specified, including the FFTW (<http://www.fftw.org>) and Intel MKL  
692 (<http://software.intel.com/en-us/mkl>) libraries. The downloadable binaries are statically linked  
693 against the MKL library as this exhibits superior speeds compared to the FFTW library on Intel-  
694 based CPUs.

695 While the lack of support for GPUs simplifies the installation and execution of *cis*TEM, it can  
696 also be a limitation on workstations that are optimized for GPU-accelerated code. These  
697 workstations often do not have many CPU cores and, therefore, *cis*TEM will run significantly  
698 more slowly than code that can take advantage of the GPU hardware. Users who would like to  
699 run both CPU and GPU-optimized software may therefore have to invest in both types of  
700 hardware. One advantage of a CPU-optimized workstation, for example a 44-core Dell Precision  
701 workstation, is that it runs significantly more quietly under load than a GPU-optimized  
702 workstation, making it easy to locate it in regular office space.

703

## 704 **Materials and Methods**

### 705 *Development of cisTEM*

706 The entire *cisTEM* image processing package was written in C++ using the wxWidgets toolkit  
707 (<http://wxwidgets.org>) to implement the GUI, as well as the libtiff library (<http://www.libtiff.org>)  
708 to support the tiff image format, the SQLite library (<https://sqlite.org>) to implement the SQL  
709 database, and Intel's MKL library (<http://software.intel.com/en-us/mkl>) for the calculation of  
710 Fourier transforms and vector products. Optionally, *cisTEM* can also be linked against the  
711 FFTW library (<http://www.fftw.org>) to replace the MKL library. The code was written and  
712 edited using Eclipse (<http://www.eclipse.org>) and GitHub (<http://github.com>) was used for  
713 version control.

714

### 715 *Image and data formats*

716 *cisTEM* stores all image data using the MRC format (Crowther et al., 1996). Additionally,  
717 particle parameters can be imported from, and exported to Frealign (Grigorieff, 2016) and Relion  
718 (Scheres, 2012).

719

## 720 **Acknowledgements**

721 The authors are grateful for feedback from early testers of *cisTEM*, including Ruben Diaz-  
722 Avalos, Sarah Loerch, Priyanka Abeyrathne, Peter Rickgauer, Ben Himes, Andrei Korostelev,  
723 Anna Loveland, Gabriel Demo, Jue Chen, Dmitry Lyumkis, Hiro Furukawa, Wei Lu and Juan  
724 Du.

725

726 **Competing Interests**

727 The authors declare no competing interest.

728

729

730

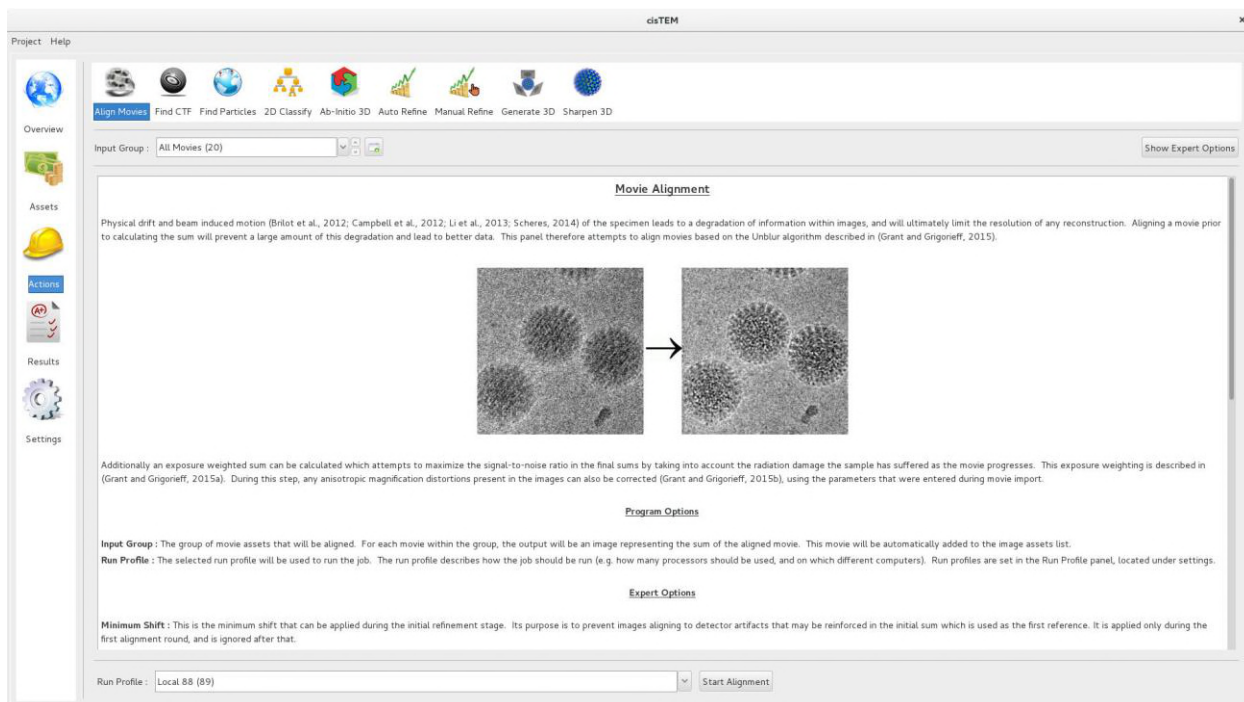

731

732 **Figure 1** Movie alignment panel of the *cisTEM* GUI. All Action panels provide background  
733 information on the operation they control, as well as a section with detailed explanations of all  
734 user-accessible parameters. All Action panels also have an Expert Options section that exposes  
735 additional parameters.

736

737

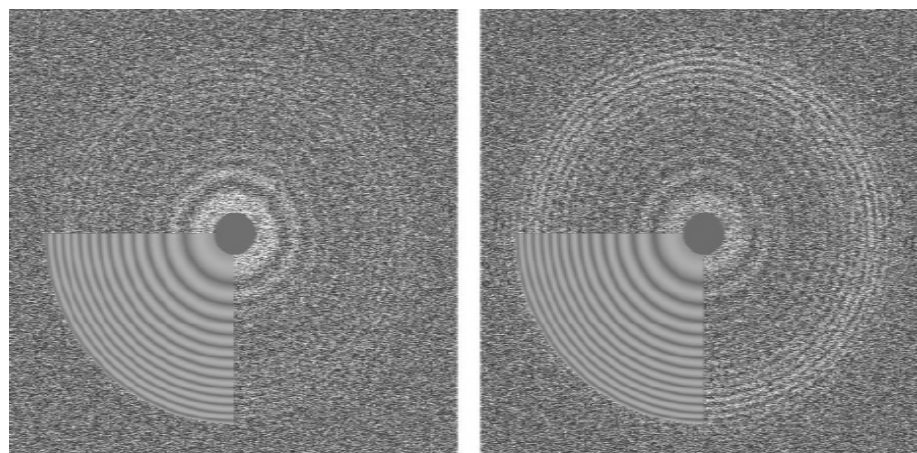

738

739 **Figure 2** Thon ring pattern calculated for micrograph “0000” of the high-resolution dataset of  $\beta$ -  
740 galactosidase (Bartesaghi et al., 2015) used to benchmark *cis*TEM. The left pattern was  
741 calculated from the average of aligned frames while the right pattern was calculated using the  
742 original movie with 3-frame sub-averages. The pattern calculated using the movie shows  
743 significantly stronger rings compared to the other pattern.

744

745

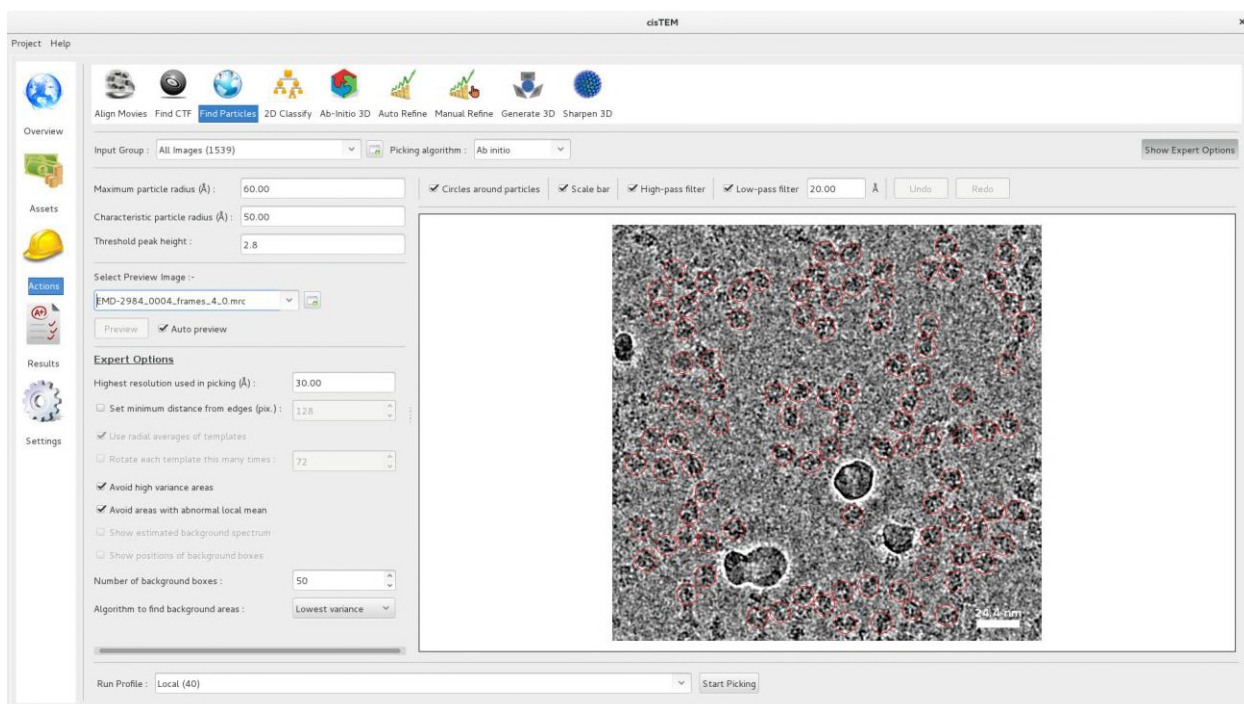

746

747 **Figure 3** Particle picking panel of the *cisTEM* GUI. The panel shows the preview mode, which  
748 allows interactive tuning of the picking parameters for optimal picking. The red circles  
749 overlaying the image of the sample indicate candidate particles. The picking algorithm avoids  
750 areas of high variance, such as the ice contamination visible in the image.

751

752

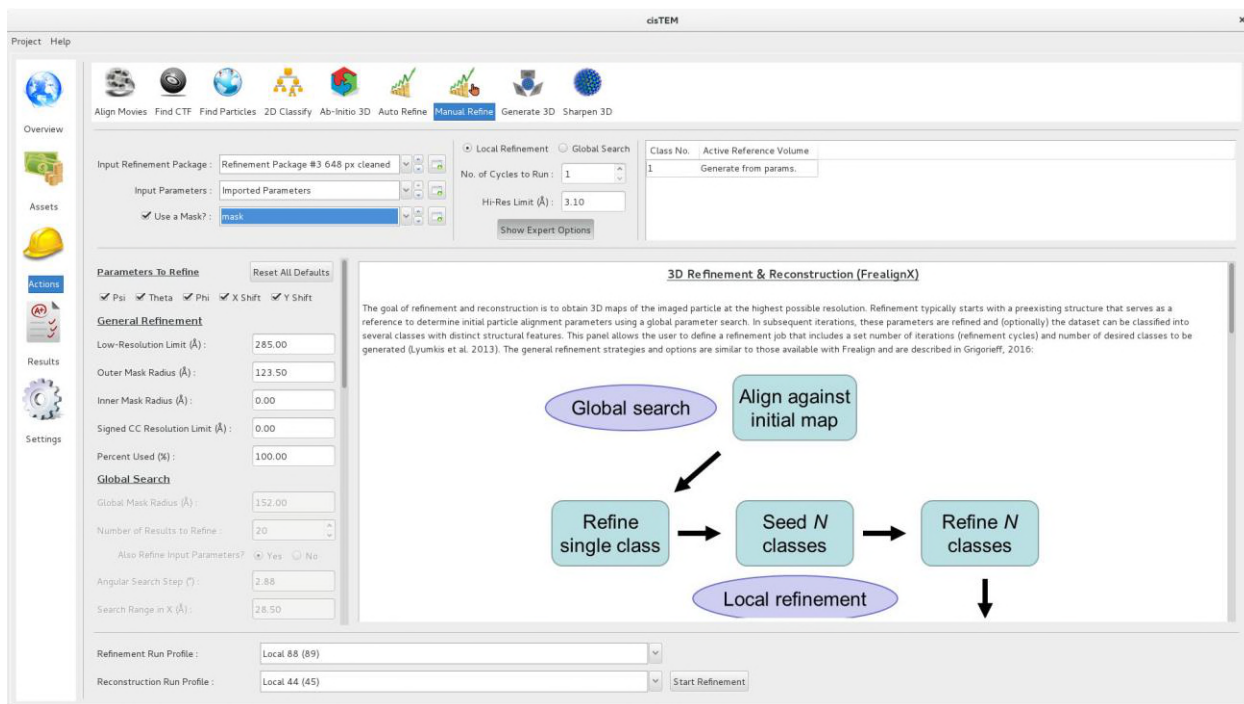

753

754 **Figure 4** Manual refinement panel with Expert Options exposed. Most of the parameters needed  
755 to run FrealignX can be accessed on this panel. The panel also allows application of a 3D mask,  
756 which can be imported as a Volume Asset.

757



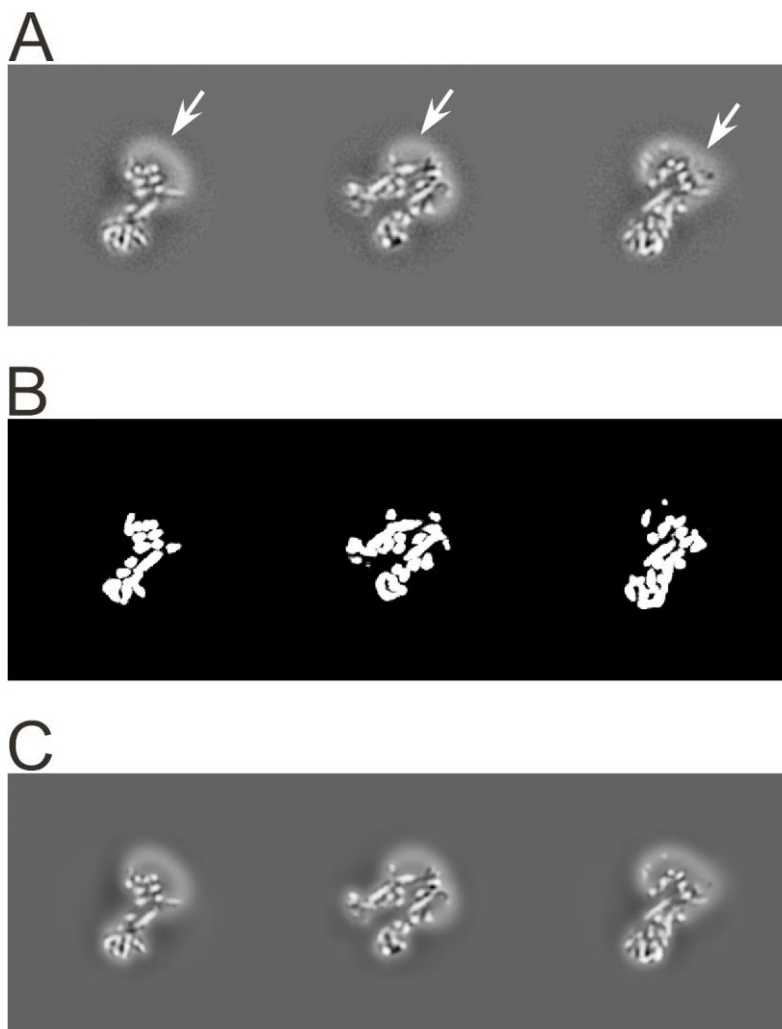

758

759 **Figure 5** 3D masking with low-pass filtering outside the mask. A) Orthogonal sections through  
760 the 3D reconstruction of the transporter associated with antigen processing (TAP), an ABC  
761 transporter (Oldham et al., 2016). Density corresponding to the protein, as well as the detergent  
762 micelle (n-Dodecyl b-D-maltoside; highlighted with arrows), is visible. B) Orthogonal sections  
763 through a 3D mask corresponding to the sections shown in A). The sharp edges of this mask are  
764 smoothed before the mask is applied to the map. C) Orthogonal sections through the masked 3D  
765 reconstruction. The regions outside the mask are low-pass filtered at 30 Å resolution to remove  
766 high-resolution noise from the disordered detergent micelle, but keeping its low-resolution signal  
767 to help particle alignment.



768

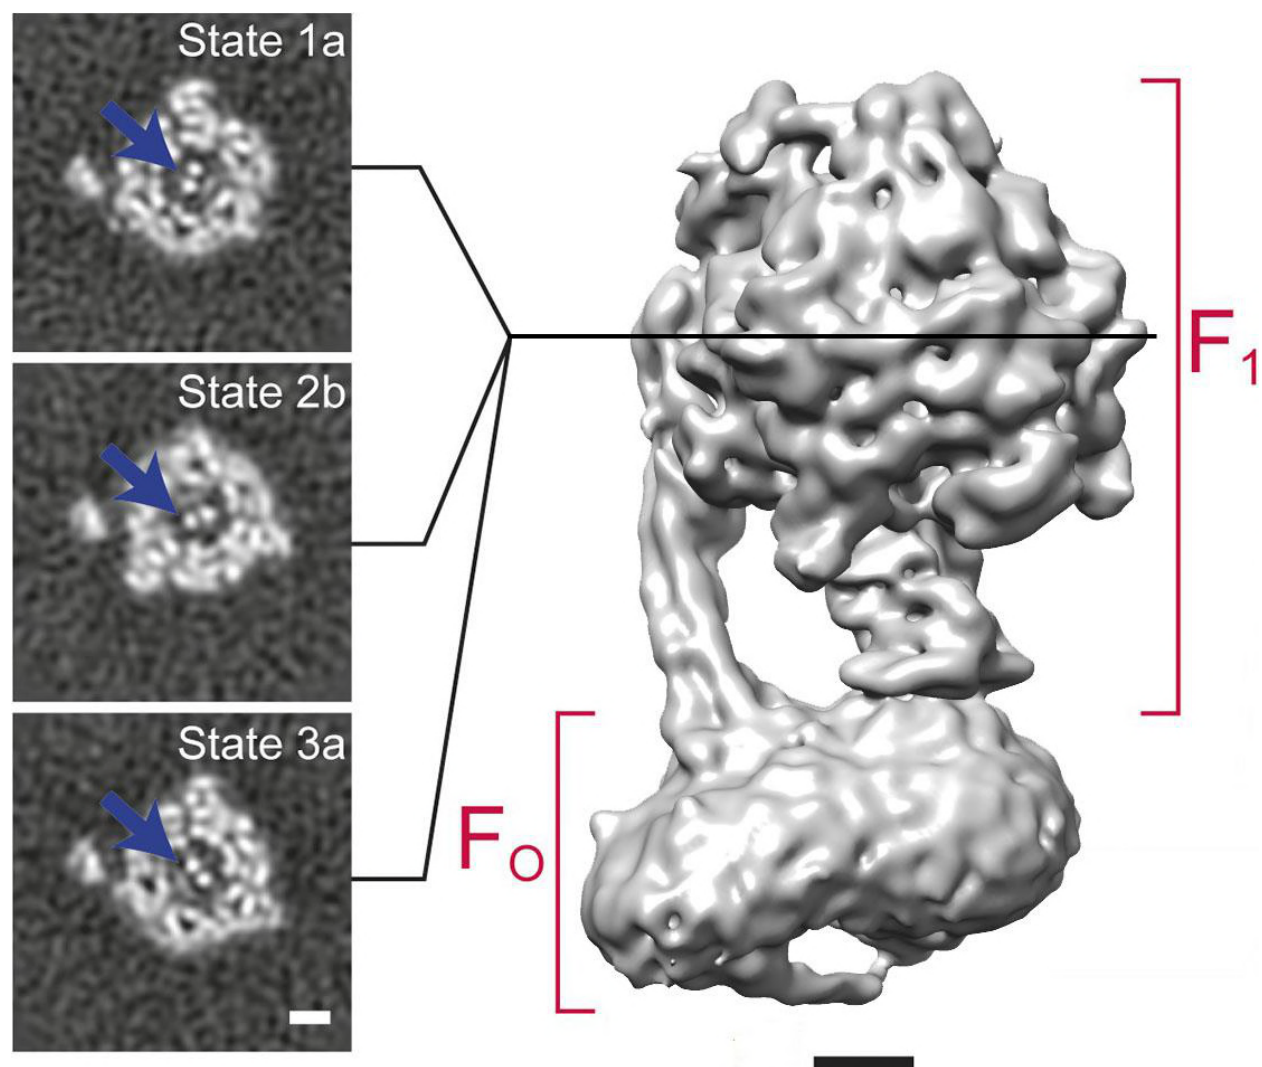

769

770 **Figure 6** 3D classification of a dataset of F<sub>1</sub>F<sub>0</sub>-ATPase, revealing different conformational states

771 (Zhou et al., 2015). Sections through the F<sub>1</sub> domain showing the  $\gamma$  subunit (arrows) in three

772 different states related by 120° rotations are shown on the left. A surface rendering of the map

773 corresponding to State 1a is shown on the right. Scale bars, 25 Å.

774

775

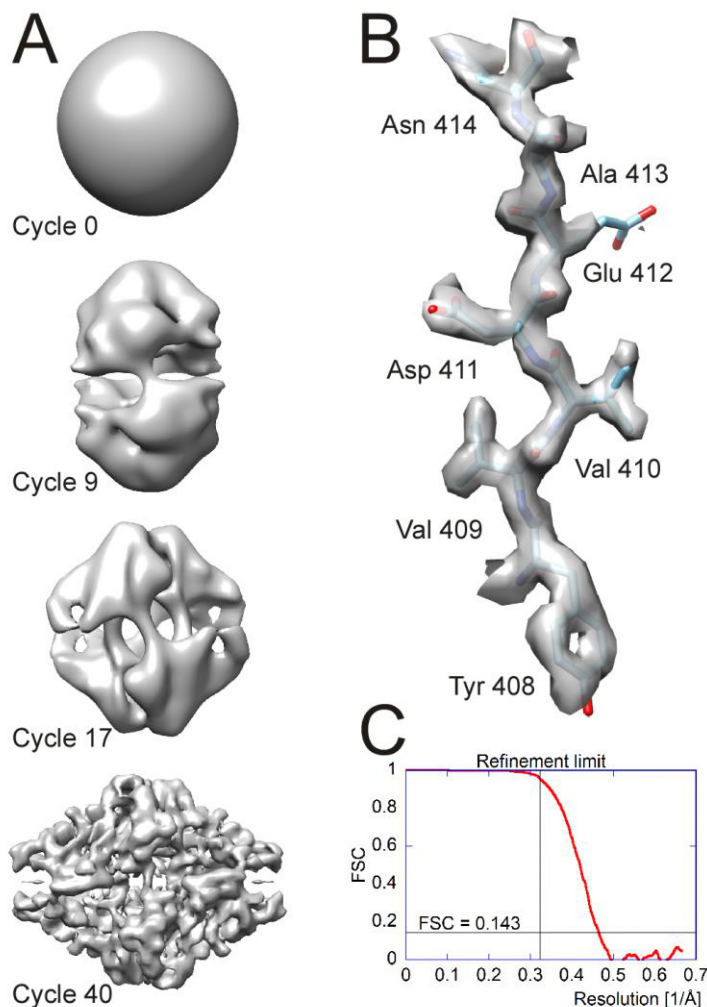

776

777 **Figure 7** Processing results of the  $\beta$ -galactosidase dataset (Bartesaghi et al., 2015) used to  
778 benchmark *cis*TEM. A) Different stages of the ab-initio reconstruction procedure, starting from a  
779 reconstruction from randomly assigned Euler angles. The process takes less than an hour to  
780 complete on a high-end CPU-based workstation. B) High-resolution detail of the refined  $\beta$ -  
781 galactosidase reconstruction with an average resolution of 2.2 Å, showing sidechain details for  
782 most amino acids. C) FSC plot for the refined  $\beta$ -galactosidase reconstruction, adjusted for the  
783 solvent background within the spherical mask applied to the half maps (Eq. (19)), and indicating  
784 the resolution limit that was not exceeded during refinement, as well as the FSC = 0.143  
785 threshold.

786 **References**

- 787 Abeyrathne, P.D., Koh, C.S., Grant, T., Grigorieff, N., and Korostelev, A.A. (2016). Ensemble  
788 cryo-EM uncovers inchworm-like translocation of a viral IRES through the ribosome. *Elife* 5.
- 789 Bartesaghi, A., Matthies, D., Banerjee, S., Merk, A., and Subramaniam, S. (2014). Structure of  
790 beta-galactosidase at 3.2-Å resolution obtained by cryo-electron microscopy. *Proc Natl Acad Sci*  
791 *U S A* 111, 11709-11714.
- 792 Bartesaghi, A., Merk, A., Banerjee, S., Matthies, D., Wu, X., Milne, J.L., and Subramaniam, S.  
793 (2015). 2.2 Å resolution cryo-EM structure of beta-galactosidase in complex with a cell-  
794 permeant inhibitor. *Science* 348, 1147-1151.
- 795 Chen, J.Z., Settembre, E.C., Aoki, S.T., Zhang, X., Bellamy, A.R., Dormitzer, P.R., Harrison,  
796 S.C., and Grigorieff, N. (2009). Molecular interactions in rotavirus assembly and uncoating seen  
797 by high-resolution cryo-EM. *Proc Natl Acad Sci U S A* 106, 10644-10648.
- 798 Cheng, Y., Grigorieff, N., Penczek, P.A., and Walz, T. (2015). A primer to single-particle cryo-  
799 electron microscopy. *Cell* 161, 438-449.
- 800 Conesa Mingo, P., Gutierrez, J., Quintana, A., de la Rosa Trevin, J.M., Zaldivar-Peraza, A.,  
801 Cuenca Alba, J., Kazemi, M., Vargas, J., Del Cano, L., Segura, J., *et al.* (2018). Scipion web  
802 tools: Easy to use cryo-EM image processing over the web. *Protein Sci* 27, 269-275.
- 803 Crowther, R.A., Henderson, R., and Smith, J.M. (1996). MRC image processing programs. *J*  
804 *Struct Biol* 116, 9-16.

- 805 Desfosses, A., Ciuffa, R., Gutsche, I., and Sachse, C. (2014). SPRING - an image processing  
806 package for single-particle based helical reconstruction from electron cryomicrographs. *J Struct*  
807 *Biol* *185*, 15-26.
- 808 Frank, J., Radermacher, M., Penczek, P., Zhu, J., Li, Y., Ladjadj, M., and Leith, A. (1996).  
809 SPIDER and WEB: processing and visualization of images in 3D electron microscopy and  
810 related fields. *J Struct Biol* *116*, 190-199.
- 811 Grant, T., and Grigorieff, N. (2015a). Automatic estimation and correction of anisotropic  
812 magnification distortion in electron microscopes. *J Struct Biol* *192*, 204-208.
- 813 Grant, T., and Grigorieff, N. (2015b). Measuring the optimal exposure for single particle cryo-  
814 EM using a 2.6 Å reconstruction of rotavirus VP6. *Elife* *4*, e06980.
- 815 Grigorieff, N. (2000). Resolution measurement in structures derived from single particles. *Acta*  
816 *Crystallogr D Biol Crystallogr* *56*, 1270-1277.
- 817 Grigorieff, N. (2007). FREALIGN: high-resolution refinement of single particle structures. *J*  
818 *Struct Biol* *157*, 117-125.
- 819 Grigorieff, N. (2016). Frealign: An Exploratory Tool for Single-Particle Cryo-EM. *Methods*  
820 *Enzymol* *579*, 191-226.
- 821 Harauz, G., and van Heel, M. (1986). Exact Filters for General Geometry 3-Dimensional  
822 Reconstruction. *Optik* *73*, 146-156.
- 823 Henderson, R. (2013). Avoiding the pitfalls of single particle cryo-electron microscopy: Einstein  
824 from noise. *Proc Natl Acad Sci U S A* *110*, 18037-18041.

825 Hohn, M., Tang, G., Goodyear, G., Baldwin, P.R., Huang, Z., Penczek, P.A., Yang, C., Glaeser,  
826 R.M., Adams, P.D., and Ludtke, S.J. (2007). SPARX, a new environment for Cryo-EM image  
827 processing. *J Struct Biol* 157, 47-55.

828 Iudin, A., Korir, P.K., Salavert-Torres, J., Kleywegt, G.J., and Patwardhan, A. (2016). EMPIAR:  
829 a public archive for raw electron microscopy image data. *Nat Methods* 13, 387-388.

830 Kimanius, D., Forsberg, B.O., Scheres, S.H., and Lindahl, E. (2016). Accelerated cryo-EM  
831 structure determination with parallelisation using GPUs in RELION-2. *Elife* 5.

832 Loveland, A.B., Demo, G., Grigorieff, N., and Korostelev, A.A. (2017). Ensemble cryo-EM  
833 elucidates the mechanism of translation fidelity. *Nature* 546, 113-117.

834 Lyumkis, D., Brilot, A.F., Theobald, D.L., and Grigorieff, N. (2013). Likelihood-based  
835 classification of cryo-EM images using FREALIGN. *J Struct Biol* 183, 377-388.

836 Mastronarde, D.N., and Held, S.R. (2017). Automated tilt series alignment and tomographic  
837 reconstruction in IMOD. *J Struct Biol* 197, 102-113.

838 Matthews, B.W. (1968). Solvent content of protein crystals. *J Mol Biol* 33, 491-497.

839 McDonough, R.N., and Whalen, A.D. (1995). *Detection of Signals in Noise*, 2nd edn (San  
840 Diego: Academic Press).

841 McMullan, G., Faruqi, A.R., and Henderson, R. (2016). Direct Electron Detectors. *Methods*  
842 *Enzymol* 579, 1-17.

843 McMullan, G., Vinothkumar, K.R., and Henderson, R. (2015). Thon rings from amorphous ice  
844 and implications of beam-induced Brownian motion in single particle electron cryo-microscopy.  
845 *Ultramicroscopy* 158, 26-32.

- 846 Mindell, J.A., and Grigorieff, N. (2003). Accurate determination of local defocus and specimen  
847 tilt in electron microscopy. *J Struct Biol* *142*, 334-347.
- 848 Moriya, T., Saur, M., Stabrin, M., Merino, F., Voicu, H., Huang, Z., Penczek, P.A., Raunser, S.,  
849 and Gatsogiannis, C. (2017). High-resolution Single Particle Analysis from Electron Cryo-  
850 microscopy Images Using SPHIRE. *J Vis Exp*.
- 851 Oldham, M.L., Grigorieff, N., and Chen, J. (2016). Structure of the transporter associated with  
852 antigen processing trapped by herpes simplex virus. *Elife* *5*.
- 853 Penczek, P.A., Fang, J., Li, X., Cheng, Y., Loerke, J., and Spahn, C.M. (2014). CTER-rapid  
854 estimation of CTF parameters with error assessment. *Ultramicroscopy* *140*, 9-19.
- 855 Punjani, A., Rubinstein, J.L., Fleet, D.J., and Brubaker, M.A. (2017). cryoSPARC: algorithms  
856 for rapid unsupervised cryo-EM structure determination. *Nat Methods* *14*, 290-296.
- 857 Reboul, C.F., Eager, M., Elmlund, D., and Elmlund, H. (2018). Single-particle cryo-EM-  
858 Improved ab initio 3D reconstruction with SIMPLE/PRIME. *Protein Sci* *27*, 51-61.
- 859 Rohou, A., and Grigorieff, N. (2015). CTFFIND4: Fast and accurate defocus estimation from  
860 electron micrographs. *J Struct Biol* *192*, 216-221.
- 861 Roseman, A.M. (2004). FindEM--a fast, efficient program for automatic selection of particles  
862 from electron micrographs. *J Struct Biol* *145*, 91-99.
- 863 Rosenthal, P.B., and Henderson, R. (2003). Optimal determination of particle orientation,  
864 absolute hand, and contrast loss in single-particle electron cryomicroscopy. *J Mol Biol* *333*, 721-  
865 745.

- 866 Scheres, S.H. (2012). RELION: implementation of a Bayesian approach to cryo-EM structure  
867 determination. *J Struct Biol* *180*, 519-530.
- 868 Scheres, S.H., and Chen, S. (2012). Prevention of overfitting in cryo-EM structure determination.  
869 *Nat Methods* *9*, 853-854.
- 870 Scheres, S.H., Valle, M., Nunez, R., Sorzano, C.O., Marabini, R., Herman, G.T., and Carazo,  
871 J.M. (2005). Maximum-likelihood multi-reference refinement for electron microscopy images. *J*  
872 *Mol Biol* *348*, 139-149.
- 873 Sheth, L.K., Piotrowski, A.L., and Voss, N.R. (2015). Visualization and quality assessment of  
874 the contrast transfer function estimation. *J Struct Biol* *192*, 222-234.
- 875 Sigworth, F.J. (2004). Classical detection theory and the cryo-EM particle selection problem. *J*  
876 *Struct Biol* *145*, 111-122.
- 877 Sindelar, C.V., and Grigorieff, N. (2012). Optimal noise reduction in 3D reconstructions of  
878 single particles using a volume-normalized filter. *J Struct Biol* *180*, 26-38.
- 879 Stewart, A., and Grigorieff, N. (2004). Noise bias in the refinement of structures derived from  
880 single particles. *Ultramicroscopy* *102*, 67-84.
- 881 Subramaniam, S. (2013). Structure of trimeric HIV-1 envelope glycoproteins. *Proc Natl Acad*  
882 *Sci U S A* *110*, E4172-4174.
- 883 Subramaniam, S., Earl, L.A., Falconieri, V., Milne, J.L., and Egelman, E.H. (2016). Resolution  
884 advances in cryo-EM enable application to drug discovery. *Curr Opin Struct Biol* *41*, 194-202.
- 885 Tang, G., Peng, L., Baldwin, P.R., Mann, D.S., Jiang, W., Rees, I., and Ludtke, S.J. (2007).  
886 EMAN2: an extensible image processing suite for electron microscopy. *J Struct Biol* *157*, 38-46.



- 887 Thon, F. (1966). Zur Defokussierungsabhängigkeit des Phasenkontrastes bei der  
888 elektronenmikroskopischen Abbildung. *Z Naturforschung 21a*, 476–478.
- 889 van Heel, M. (1982). Detection of Objects in Quantum-Noise-Limited Images. *Ultramicroscopy*  
890 7, 331-341.
- 891 van Heel, M. (2013). Finding trimeric HIV-1 envelope glycoproteins in random noise. *Proc Natl*  
892 *Acad Sci U S A 110*, E4175-4177.
- 893 van Heel, M., Harauz, G., Orlova, E.V., Schmidt, R., and Schatz, M. (1996). A new generation  
894 of the IMAGIC image processing system. *J Struct Biol 116*, 17-24.
- 895 Zhang, K. (2016). Gctf: Real-time CTF determination and correction. *J Struct Biol 193*, 1-12.
- 896 Zhou, A., Rohou, A., Schep, D.G., Bason, J.V., Montgomery, M.G., Walker, J.E., Grigorieff, N.,  
897 and Rubinstein, J.L. (2015). Structure and conformational states of the bovine mitochondrial  
898 ATP synthase by cryo-EM. *Elife 4*, e10180.
- 899
